# Supplementary material for: Long non-coding RNA HULC as a novel serum biomarker for diagnosis and prognosis prediction of gastric cancer
Source: PubMed Central journal article supplement (PMC5239513; doi:10.18632/oncotarget.10107), 2016-06-16
Supplement: oncotarget-07-51763-s001.pdf [file oncotarget-07-51763-s001.pdf]

## Long non-coding RNA HULC as a novel serum biomarker for diagnosis and prognosis prediction of gastric cancer

### SUPPLEMENTARY TABLE

Supplementary Table S1: Intra-assay and inter-assay repeatability

|                    | HULC         | GAPDH        |
|--------------------|--------------|--------------|
| <b>Intra-assay</b> |              |              |
| Mean±SE            | 32.25±0.2944 | 30.20±0.0785 |
| CV(%)              | 2.89%        | 0.82%        |
| <b>Inter-assay</b> |              |              |
| Mean±SE            | 32.88±0.5039 | 30.76±0.2323 |
| CV(%)              | 4.85%        | 2.39%        |
